# Supplementary material
Source: PubMed Central journal article supplement (PMC5583642)
Supplement: NIHMS898272-supplement-TableS1.pdf [file NIHMS898272-supplement-TableS1.pdf]

| Accession                            | Gene Name | MW(kDa) | Ccr7-/-  |            |        |          | Sib3ialV-/- |            |        |          | Nrp-2-/- |            |        |          |
|--------------------------------------|-----------|---------|----------|------------|--------|----------|-------------|------------|--------|----------|----------|------------|--------|----------|
|                                      |           |         | Coverage | # Peptides | # PSMs | Area     | Coverage    | # Peptides | # PSMs | Area     | Coverage | # Peptides | # PSMs | Area     |
| gil5915682 splP07724.3 ALBU_MOUSE    | Alb       | 68.6    | 7.07     | 3          | 70     | 6.04E+10 | 8.06        | 4          | 65     | 6.63E+10 | 8.06     | 4          | 57     | 4.15E+10 |
| gil122016 splP10853.2 H2B1F_MOUSE    | Hist1h2bn | 13.9    | 46.83    | 7          | 42     | 2.56E+09 | 46.83       | 7          | 40     | 2.25E+09 | 53.97    | 9          | 67     | 8.33E+09 |
| gil18171239 splQ8CGP6.3 H2A1H_MOUSE  | Hist1h2ah | 13.9    | 35.94    | 4          | 18     | 2.36E+09 | 27.34       | 3          | 14     | 1.85E+09 | 35.94    | 4          | 18     | 4.75E+09 |
| gil121905 splP15864.2 H12_MOUSE      | Hist1h1c  | 21.3    | 33.02    | 9          | 31     | 3.14E+09 | 36.32       | 10         | 30     | 3.99E+09 | 36.32    | 10         | 33     | 3.31E+09 |
| gil21903465 splP47963.3 RL13_MOUSE   | Rpl13     | 24.3    | 49.76    | 11         | 55     | 3.38E+09 | 50.71       | 12         | 87     | 6.31E+09 | 50.24    | 15         | 72     | 3.25E+09 |
| gil1170151 splP43274.2 H14_MOUSE     | Hist1h1e  | 22.0    | 19.63    | 7          | 32     | 2.60E+09 | 30.14       | 9          | 28     | 3.08E+09 | 19.63    | 7          | 32     | 2.96E+09 |
| gil126302559 splP04104.4 K2C1_MOUSE  | Krt1      | 65.6    | 6.44     | 6          | 24     | 1.90E+09 | 6.44        | 6          | 22     | 3.22E+09 | 6.44     | 7          | 28     | 2.50E+09 |
| gil22001904 splQ9CPR4.3 RL17_MOUSE   | Rpl17     | 21.4    | 50.54    | 10         | 57     | 2.12E+09 | 50.54       | 10         | 66     | 3.44E+09 | 50.54    | 10         | 58     | 2.18E+09 |
| gil66773987 splQ6IFZ6.1 K2C1B_MOUSE  | Krt77     | 61.3    | 7.52     | 7          | 32     | 1.61E+09 | 7.52        | 7          | 27     | 2.79E+09 | 7.52     | 7          | 31     | 2.09E+09 |
| gil306526288 splP14115.5 RL27A_MOUSE | Rpl27a    | 16.6    | 37.84    | 7          | 32     | 2.26E+09 | 48.65       | 9          | 36     | 3.81E+09 | 31.76    | 6          | 27     | 1.97E+09 |
| gil21264500 splP35980.3 RL18_MOUSE   | Rpl18     | 21.6    | 44.15    | 12         | 62     | 3.75E+09 | 45.21       | 10         | 56     | 6.63E+09 | 45.21    | 10         | 45     | 1.85E+09 |
| gil1892069 splQ6NXH9.1 K2C73_MOUSE   | Krt73     | 58.9    | 10.58    | 8          | 21     | 1.48E+09 | 10.58       | 8          | 19     | 2.54E+09 | 10.58    | 8          | 19     | 1.79E+09 |
| gil1170668 splQ922U2.1 K2C5_MOUSE    | Krt5      | 61.7    | 25.86    | 23         | 57     | 1.05E+09 | 31.21       | 26         | 62     | 1.72E+09 | 27.76    | 25         | 68     | 1.61E+09 |
| gil60416436 splP50446.3 K2C6A_MOUSE  | Krt6a     | 59.3    | 0        | 0          | 0      | 0.00E+00 |             | 0          | 0      | 0.00E+00 | 30.38    | 26         | 55     | 1.59E+09 |
| gil135070 splP47915.2 RL29_MOUSE     | Rpl29     | 17.6    | 25.00    | 5          | 27     | 1.73E+09 | 27.50       | 6          | 27     | 3.16E+09 | 25.00    | 5          | 21     | 1.58E+09 |
| gil116242600 splP02535.3 K1C10_MOUSE | Krt10     | 57.7    | 13.51    | 10         | 60     | 1.46E+09 | 13.51       | 10         | 65     | 3.31E+09 | 13.51    | 10         | 64     | 1.57E+09 |
| gil123791931 splQ3UV17.1 K22O_MOUSE  | Krt76     | 62.8    | 9.26     | 8          | 19     | 9.21E+08 | 9.26        | 8          | 21     | 1.45E+09 | 10.77    | 9          | 23     | 1.43E+09 |
| gil133015 splP12970.2 RL7A_MOUSE     | Rpl7a     | 30.0    | 46.62    | 18         | 74     | 1.10E+09 | 46.24       | 17         | 67     | 1.27E+09 | 50.00    | 19         | 73     | 1.88E+09 |
| gil23396626 splQ9QWL7.3 K1C17_MOUSE  | Krt17     | 48.1    | 19.63    | 11         | 24     | 8.24E+08 |             | 0          | 0      | 0.00E+00 | 44.34    | 21         | 47     | 1.37E+09 |
| gil205371802 splQ8VDY5.4 MYH9_MOUSE  | Mvh9      | 226.2   | 10.00    | 17         | 20     | 7.23E+07 | 67.30       | 171        | 1426   | 1.35E+10 | 60.97    | 137        | 494    | 1.32E+09 |
| gil302393751 splP62983.2 R27A_MOUSE  | Rps27a    | 17.9    | 48.72    | 7          | 44     | 1.54E+09 | 54.49       | 9          | 52     | 1.84E+09 | 41.03    | 6          | 37     | 1.13E+09 |
| gil13878273 splQ9D1R9.2 RL34_MOUSE   | Rpl34     | 13.3    | 36.75    | 6          | 28     | 1.67E+09 | 37.61       | 7          | 32     | 2.15E+09 | 37.61    | 7          | 24     | 1.10E+09 |
| gil1170153 splP43275.2 H11_MOUSE     | Hist1h1a  | 21.8    | 0        | 0          | 0      | 0.00E+00 | 22.54       | 5          | 11     | 1.25E+09 | 23.00    | 5          | 11     | 1.05E+09 |
| gil1170154 splP43276.2 H15_MOUSE     | Hist1h1b  | 22.6    | 26.46    | 8          | 18     | 6.74E+08 | 29.60       | 9          | 20     | 8.00E+08 | 27.35    | 9          | 24     | 1.05E+09 |
| gil1891691 splQ6IFX2.1 K1C42_MOUSE   | Krt42     | 50.1    | 18.81    | 9          | 20     | 3.34E+08 | 18.14       | 9          | 17     | 8.54E+08 | 28.98    | 14         | 42     | 1.03E+09 |
| gil33302628 splQ61781.2 K1C14_MOUSE  | Krt14     | 52.8    | 19.42    | 10         | 47     | 6.28E+08 | 20.25       | 10         | 45     | 1.40E+09 | 38.43    | 19         | 84     | 9.88E+08 |
| gil62296680 splP47911.3 RL6_MOUSE    | Rpl6      | 33.5    | 51.01    | 18         | 66     | 1.34E+09 | 45.27       | 17         | 54     | 1.15E+09 | 51.01    | 18         | 59     | 9.21E+08 |
| gil23396632 splQ9Z2K1.3 K1C16_MOUSE  | Krt16     | 51.6    | 13.43    | 7          | 40     | 6.05E+08 |             | 0          | 0      | 0.00E+00 | 21.54    | 12         | 77     | 9.13E+08 |
| gil138536 splP20152.3 VIME_MOUSE     | Vim       | 53.7    | 61.37    | 29         | 94     | 4.10E+08 | 77.04       | 36         | 150    | 1.60E+09 | 68.67    | 33         | 137    | 8.99E+08 |
| gil1879424 splQ8VEK3.1 HNRPU_MOUSE   | Hnrpu     | 87.9    | 28.13    | 26         | 92     | 8.69E+08 | 31.62       | 26         | 83     | 1.27E+09 | 30.88    | 25         | 83     | 8.34E+08 |
| gil2500367 splQ09167.3 RL21_MOUSE    | Rpl21     | 18.6    | 45.00    | 8          | 29     | 4.79E+08 | 50.63       | 10         | 44     | 1.34E+09 | 46.25    | 10         | 33     | 7.84E+08 |
| gil730549 splP41105.2 RL28_MOUSE     | Rpl28     | 15.7    | 59.85    | 14         | 55     | 1.17E+09 | 59.12       | 13         | 66     | 2.86E+09 | 54.74    | 10         | 38     | 7.71E+08 |
| gil22001911 splQ9D8E6.3 RL4_MOUSE    | Rpl4      | 47.1    | 44.39    | 23         | 84     | 7.58E+08 | 44.15       | 23         | 86     | 1.30E+09 | 43.20    | 20         | 63     | 7.66E+08 |
| gil1350769 splP14148.2 RL7_MOUSE     | Rpl7      | 31.4    | 48.15    | 24         | 80     | 9.88E+08 | 55.19       | 27         | 80     | 1.33E+09 | 47.78    | 24         | 76     | 7.26E+08 |
| gil123796763 splQ3TTY5.1 K22E_MOUSE  | Krt2      | 70.9    | 10.04    | 11         | 36     | 7.32E+08 | 10.04       | 11         | 39     | 1.45E+09 | 10.18    | 12         | 39     | 7.24E+08 |
| gil1350733 splP47964.2 RL36_MOUSE    | Rpl36     | 12.2    | 31.43    | 5          | 23     | 6.96E+08 | 30.48       | 4          | 23     | 1.37E+09 | 23.81    | 3          | 17     | 7.18E+08 |
| gil136478 splP19253.4 RL13A_MOUSE    | Rpl13a    | 23.4    | 47.29    | 14         | 45     | 8.48E+08 | 43.35       | 13         | 49     | 1.25E+09 | 41.38    | 12         | 40     | 7.09E+08 |
| gil52783239 splQ9CR57.3 RL14_MOUSE   | Rpl14     | 23.5    | 31.80    | 8          | 30     | 6.57E+08 | 37.33       | 10         | 38     | 1.28E+09 | 34.56    | 9          | 30     | 7.04E+08 |
| gil48428680 splQ9D823.3 RL37_MOUSE   | Rpl37     | 11.1    | 15.46    | 4          | 5      | 6.04E+08 | 21.65       | 5          | 17     | 2.34E+09 | 19.59    | 4          | 6      | 6.32E+08 |
| gil81916088 splQ91VM5.1 IRMXL1_MOUSE | Rbmxl1    | 42.1    | 38.14    | 15         | 49     | 3.09E+08 | 44.07       | 18         | 74     | 8.82E+08 | 38.14    | 15         | 50     | 3.38E+08 |
| gil81917893 splQ9VW02.1 IRBMX_MOUSE  | RbmX      | 42.3    | 34.78    | 15         | 44     | 3.09E+08 | 38.62       | 17         | 61     | 8.82E+08 | 37.60    | 15         | 47     | 3.38E+08 |
| gil391358189 splP02301.3 H3C_MOUSE   | Gm7426    | 15.3    | 25.74    | 5          | 15     | 2.64E+08 | 30.15       | 6          | 18     | 3.00E+08 | 25.74    | 5          | 13     | 3.27E+08 |
| gil3122836 splP97351.3 IRS3A_MOUSE   | Rps3a1    | 29.9    | 53.79    | 15         | 55     | 2.22E+08 | 53.79       | 16         | 70     | 3.30E+08 | 61.36    | 18         | 69     | 3.24E+08 |
| gil341942150 splP27659.3 RL3_MOUSE   | Rpl3      | 46.1    | 48.88    | 24         | 73     | 3.66E+08 | 49.88       | 22         | 80     | 5.53E+08 | 50.12    | 22         | 66     | 3.11E+08 |
| gil519668679 splP21107.3 TPM3_MOUSE  | Tpm3      | 33.0    | 11.58    | 3          | 4      | 1.71E+07 | 37.54       | 15         | 33     | 8.40E+08 | 34.74    | 15         | 29     | 2.82E+08 |
| gil54036077 splQ9CY57.2 CHTOP_MOUSE  | Chtop     | 26.6    | 32.53    | 9          | 51     | 4.32E+08 | 34.54       | 9          | 52     | 5.20E+08 | 32.13    | 8          | 46     | 2.10E+08 |
| gil120702 splP16858.2 IG3P_MOUSE     | Gapdh     | 35.8    | 42.94    | 10         | 32     | 2.46E+08 | 45.65       | 10         | 30     | 3.66E+08 | 42.94    | 10         | 29     | 1.87E+08 |
| gil22002065 splP47962.3 RL5_MOUSE    | Rpl5      | 34.4    | 31.99    | 11         | 32     | 1.06E+08 | 35.35       | 13         | 34     | 1.40E+08 | 31.99    | 12         | 35     | 1.72E+08 |
| gil1880390 splQ9CQN7.1 IRM41_MOUSE   | Mrp41     | 15.3    | 57.04    | 7          | 18     | 1.76E+08 | 34.07       | 4          | 5      | 3.83E+07 | 62.22    | 8          | 18     | 1.50E+08 |
| gil3122833 splP97461.3 IRS5_MOUSE    | Rps5      | 22.9    | 27.45    | 5          | 10     | 6.32E+07 | 27.45       | 6          | 29     | 2.47E+08 | 35.29    | 9          | 22     | 1.50E+08 |
| gil1703188 splP51881.3 ADT2_MOUSE    | Sic25a5   | 32.9    | 16.11    | 5          | 11     | 4.36E+07 | 28.19       | 9          | 15     | 2.08E+08 | 23.49    | 8          | 14     | 1.42E+08 |
| gil341940836 splQ9WTL4.2 INSRR_MOUSE | Insr      | 144.8   | 0        | 0          | 0      | 0.00E+00 |             | 0          | 0      | 0.00E+00 | 0.62     | 2          | 2      | 1.31E+08 |
| gil341940334 splP47774.2 CCR7_MOUSE  | Ccr7      | 42.8    | 0        | 0          | 0      | 0.00E+00 |             | 0          | 0      | 0.00E+00 | 8.47     | 3          | 6      | 1.16E+08 |
| gil45477334 splQ9ERU3.2 ZNF22_MOUSE  | Zfp422    | 27.3    | 33.76    | 8          | 20     | 6.12E+07 | 45.99       | 13         | 29     | 1.47E+08 | 37.13    | 9          | 23     | 1.11E+08 |
| gil22001919 splQ9JH8.3 RL38_MOUSE    | Rpl38     | 8.2     | 32.86    | 4          | 5      | 5.71E+07 | 32.86       | 4          | 9      | 1.40E+08 | 32.86    | 4          | 6      | 1.07E+08 |
| gil2506545 splP20029.3 GRP78_MOUSE   | Hspa5     | 72.4    | 41.53    | 24         | 44     | 1.02E+08 | 43.51       | 27         | 45     | 1.95E+08 | 42.75    | 24         | 38     | 9.73E+07 |
| gil21903459 splP51410.2 RL9_MOUSE    | Rpl9      | 21.9    | 22.92    | 4          | 7      | 2.22E+07 | 22.92       | 4          | 12     | 8.79E+07 | 29.17    | 5          | 14     | 9.34E+07 |
| gil547923 splP35700.1 PRDX1_MOUSE    | Prdx1     | 22.2    | 21.11    | 4          | 9      | 9.85E+07 | 45.73       | 10         | 16     | 1.29E+08 | 41.21    | 9          | 14     | 8.62E+07 |
| gil54036480 splQ6IRU2.3 TPM4_MOUSE   | Tpm4      | 28.5    | 0        | 0          | 0      | 0.00E+00 | 49.60       | 17         | 36     | 2.10E+08 | 52.02    | 18         | 32     | 8.43E+07 |
| gil116849 splP18760.3 COF1_MOUSE     | Cof1      | 18.5    | 52.41    | 7          | 12     | 1.42E+08 | 42.17       | 7          | 11     | 1.86E+08 | 27.11    | 3          | 7      | 8.37E+07 |
| gil20139648 splQ9N9N1.1 IRM34_MOUSE  | Mrp34     | 10.5    | 0        | 0          | 0      | 0.00E+00 |             | 0          | 0      | 0.00E+00 | 23.91    | 2          | 4      | 6.70E+07 |
| gil341940436 splQ61656.2 DDX5_MOUSE  | Ddx5      | 69.2    | 9.93     | 7          | 9      | 4.06E+07 | 25.57       | 16         | 22     | 1.13E+08 | 19.38    | 13         | 17     | 6.69E+07 |
| gil416677 splQ03265.1 ATPA_MOUSE     | Atpa5a1   | 59.7    | 13.56    | 6          | 8      | 2.52E+07 | 24.59       | 11         | 18     | 9.35E+07 | 26.22    | 12         | 18     | 6.66E+07 |
| gil23396881 splQ9JHJ0.1 TMOD3_MOUSE  | Tmod3     | 39.5    | 0        | 0          | 0      | 0.00E+00 | 48.01       | 20         | 53     | 9.61E+08 | 34.66    | 12         | 16     | 6.54E+07 |

|                                      |          |       |       |    |    |          |       |    |     |          |       |    |    |          |
|--------------------------------------|----------|-------|-------|----|----|----------|-------|----|-----|----------|-------|----|----|----------|
| gil146345448 splP52480.4IKPYM_MOUSE  | Pkm      | 57.8  | 35.78 | 16 | 27 | 1,17E+08 | 34.09 | 16 | 24  | 1,70E+08 | 40.11 | 17 | 22 | 6.25E+07 |
| gil83305636 splQ8K2Y7.2IRM47_MOUSE   | Mrp147   | 29.7  | 28.97 | 8  | 19 | 3.93E+07 | 11.51 | 3  | 3   | 6.91E+06 | 25.00 | 7  | 17 | 6.23E+07 |
| gil47605546 splQ9DB20.1IATPO_MOUSE   | Atp5a    | 23.3  | 23.00 | 4  | 9  | 4.56E+07 | 15.02 | 3  | 8   | 9.56E+07 | 31.92 | 6  | 10 | 6.20E+07 |
| gil158518540 splQ04750.2ITOP1_MOUSE  | Top1     | 90.8  | 4.95  | 3  | 4  | 4.95E+06 | 5.74  | 4  | 5   | 8.01E+06 | 28.03 | 20 | 32 | 6.15E+07 |
| gil1363776 splP17182.3IENOA_MOUSE    | Eno1     | 47.1  | 45.39 | 15 | 29 | 9.51E+07 | 47.24 | 16 | 28  | 1.58E+08 | 41.24 | 14 | 24 | 6.12E+07 |
| gil28381362 splP13020.3IGELS_MOUSE   | Gsn      | 85.9  | 3.08  | 2  | 2  | 3.29E+06 | 47.56 | 31 | 127 | 2.07E+09 | 19.87 | 9  | 12 | 5.68E+07 |
| gil145566796 splQ3THE2.2IML12B_MOUSE | Myl12b   | 19.8  |       | 0  | 0  | 0.00E+00 | 62.21 | 8  | 31  | 5.47E+08 | 40.12 | 6  | 9  | 5.66E+07 |
| gil32130449 splP35979.2IRL12_MOUSE   | Rpl12    | 17.8  | 63.64 | 8  | 11 | 4.74E+07 | 53.94 | 7  | 15  | 9.01E+07 | 53.94 | 7  | 10 | 5.36E+07 |
| gil399173 splP31725.3IS10A9_MOUSE    | S100a9   | 13.0  | 38.94 | 5  | 10 | 8.82E+07 | 31.86 | 3  | 7   | 6.30E+07 | 28.32 | 4  | 7  | 5.11E+07 |
| gil24212382 splQ9D2R8.1IRT33_MOUSE   | Mmps33   | 12.5  | 33.96 | 4  | 9  | 4.23E+07 | 33.96 | 4  | 9   | 6.10E+07 | 33.96 | 4  | 8  | 4.83E+07 |
| gil73920210 splP35550.2IFBRL_MOUSE   | Fbl      | 34.3  | 25.99 | 9  | 12 | 3.15E+07 | 26.91 | 8  | 13  | 5.49E+07 | 22.63 | 8  | 13 | 4.79E+07 |
| gil18202241 splQ88593.1IPGRP1_MOUSE  | Pglyrp1  | 20.5  |       | 0  | 0  | 0.00E+00 |       | 0  | 0   | 0.00E+00 | 17.58 | 2  | 2  | 4.73E+07 |
| gil126048 splP06151.3ILDHA_MOUSE     | Ldha     | 36.5  | 24.40 | 7  | 11 | 6.58E+07 | 12.35 | 4  | 5   | 7.04E+07 | 21.39 | 7  | 9  | 4.33E+07 |
| gil38258939 splQ64339.4ISG15_MOUSE   | Isg15    | 17.9  | 16.77 | 2  | 3  | 2.19E+07 | 40.37 | 4  | 8   | 2.20E+08 | 16.77 | 2  | 4  | 4.30E+07 |
| gil18203578 splQ9VVK4.1EHD1_MOUSE    | Ehd1     | 60.6  |       | 0  | 0  | 0.00E+00 |       | 0  | 0   | 0.00E+00 | 32.96 | 13 | 14 | 4.25E+07 |
| gil1346247 splP10922.4IH10_MOUSE     | H110     | 20.8  | 15.98 | 3  | 8  | 8.79E+07 | 20.62 | 4  | 6   | 1.20E+08 | 15.98 | 3  | 5  | 4.16E+07 |
| gil17376706 splQ61543.1IGSLG1_MOUSE  | Glg1     | 133.6 | 14.89 | 18 | 28 | 3.25E+07 |       | 0  | 0   | 0.00E+00 | 16.17 | 20 | 31 | 4.09E+07 |
| gil1709972 splP53026.3IRL10A_MOUSE   | Rpl10a   | 24.9  | 19.82 | 5  | 8  | 2.52E+07 | 9.68  | 3  | 5   | 4.25E+07 | 19.82 | 6  | 8  | 4.03E+07 |
| gil729000 splQ99020.1IROAA_MOUSE     | Hnmpab   | 30.8  | 15.44 | 4  | 8  | 3.94E+07 | 18.95 | 5  | 9   | 5.77E+07 | 18.95 | 5  | 8  | 3.74E+07 |
| gil81904744 splQ9D116.1IRM14_MOUSE   | Mrp14    | 15.9  | 24.14 | 3  | 6  | 1.77E+07 | 38.62 | 5  | 8   | 4.05E+07 | 42.07 | 5  | 7  | 3.70E+07 |
| gil1346470 splP19973.2ILSP1_MOUSE    | Lsp1     | 36.7  |       | 0  | 0  | 0.00E+00 | 59.09 | 16 | 51  | 9.20E+08 | 28.48 | 7  | 11 | 3.43E+07 |
| gil126599 splP17897.1LYZ1_MOUSE      | Lyz1     | 16.8  | 12.16 | 2  | 4  | 5.70E+07 | 12.16 | 2  | 3   | 3.01E+07 | 12.16 | 2  | 3  | 3.41E+07 |
| gil81871888 splQ5SUAS.1IMYO1G_MOUSE  | Myo1g    | 117.2 |       | 0  | 0  | 0.00E+00 | 55.18 | 50 | 175 | 1.21E+09 | 17.97 | 15 | 22 | 3.39E+07 |
| gil29840809 splQ61233.4IPLSL_MOUSE   | Lcp1     | 70.1  | 16.11 | 8  | 9  | 2.43E+07 | 36.04 | 18 | 25  | 1.06E+08 | 18.02 | 10 | 11 | 3.19E+07 |
| gil123783231 splQ3TEA8.1IHP1B3_MOUSE | Hp1bp3   | 60.8  | 5.23  | 3  | 5  | 7.25E+06 | 18.05 | 10 | 16  | 3.54E+07 | 15.16 | 8  | 14 | 3.17E+07 |
| gil30316201 splQ8BG05.1IROA3_MOUSE   | Hnmpa3   | 39.6  | 16.89 | 5  | 7  | 1.97E+07 | 20.84 | 6  | 10  | 5.72E+07 | 24.27 | 7  | 11 | 3.09E+07 |
| gil81916834 splQ9CX86.1IROA0_MOUSE   | Hnmpa0   | 30.5  | 8.85  | 2  | 3  | 1.28E+07 | 18.69 | 5  | 9   | 6.32E+07 | 21.31 | 5  | 8  | 3.04E+07 |
| gil81917122 splQ9D945.1ILLPH_MOUSE   | Llph     | 15.4  | 29.23 | 3  | 5  | 1.96E+07 | 49.23 | 6  | 14  | 8.23E+07 | 43.85 | 5  | 10 | 2.99E+07 |
| gil60390645 splQ9DCN2.3INB5B3_MOUSE  | Cyb5r3   | 34.1  | 21.59 | 7  | 11 | 2.84E+07 | 18.60 | 6  | 12  | 6.97E+07 | 27.91 | 8  | 11 | 2.84E+07 |
| gil32363402 splQ9DCJ5.3INDUA8_MOUSE  | Ndufa8   | 20.0  | 35.47 | 5  | 11 | 3.10E+07 | 36.63 | 5  | 12  | 5.63E+07 | 43.02 | 6  | 9  | 2.58E+07 |
| gil81869559 splQ9CQZ8.3IH2AY_MOUSE   | H2afy    | 39.7  |       | 0  | 0  | 0.00E+00 |       | 0  | 0   | 0.00E+00 | 7.80  | 2  | 3  | 2.57E+07 |
| gil1168737 splQ09200.1IB4GN1_MOUSE   | B4gaint1 | 59.2  |       | 0  | 0  | 0.00E+00 |       | 0  | 0   | 0.00E+00 | 16.14 | 9  | 10 | 2.50E+07 |
| gil76364159 splQ78IK4.1IAP00L_MOUSE  | Apool    | 29.2  |       | 0  | 0  | 0.00E+00 | 9.06  | 2  | 3   | 2.54E+07 | 24.53 | 5  | 5  | 2.48E+07 |
| gil1345696 splP47754.3ICAZA2_MOUSE   | Capza2   | 32.9  |       | 0  | 0  | 0.00E+00 | 65.38 | 14 | 26  | 5.30E+08 | 15.38 | 3  | 4  | 2.46E+07 |
| gil34925411 splQ9CR47.1INSA2_MOUSE   | Nsa2     | 30.0  |       | 0  | 0  | 0.00E+00 | 12.31 | 3  | 4   | 2.00E+07 | 17.31 | 5  | 6  | 2.40E+07 |
| gil118105 splP17742.2PIPIA_MOUSE     | Ppia     | 18.0  | 10.98 | 2  | 3  | 3.51E+07 | 21.95 | 4  | 4   | 5.30E+07 | 10.98 | 2  | 3  | 2.22E+07 |
| gil81914411 splQ8CH25.1ISLTM_MOUSE   | Sltm     | 116.8 | 8.92  | 8  | 13 | 1.65E+07 | 9.70  | 9  | 12  | 2.42E+07 | 11.35 | 10 | 16 | 2.19E+07 |
| gil115602 splP07091.1IS10A4_MOUSE    | S100a4   | 11.7  |       | 0  | 0  | 0.00E+00 | 16.83 | 2  | 2   | 2.70E+07 | 16.83 | 2  | 3  | 2.14E+07 |
| gil1705635 splP28293.2ICATG_MOUSE    | Ctsq     | 29.1  | 9.58  | 2  | 2  | 2.81E+06 |       | 0  | 0   | 0.00E+00 | 16.86 | 4  | 7  | 2.08E+07 |
| gil417489 splP23506.3PIIMT_MOUSE     | Pcmt1    | 24.6  | 28.63 | 5  | 9  | 2.84E+07 | 38.77 | 5  | 11  | 6.62E+07 | 23.79 | 4  | 7  | 2.07E+07 |
| gil11705560 splP54751.1ISIA4_MOUSE   | St3gal1  | 39.0  |       | 0  | 0  | 0.00E+00 |       | 0  | 0   | 0.00E+00 | 16.32 | 5  | 5  | 2.05E+07 |
| gil341941148 splP08752.5IGNAI2_MOUSE | Gnai2    | 40.5  |       | 0  | 0  | 0.00E+00 |       | 0  | 0   | 0.00E+00 | 4.79  | 2  | 3  | 2.03E+07 |
| gil81916767 splQ9CQP0.1IRM33_MOUSE   | Mrp133   | 7.4   |       | 0  | 0  | 0.00E+00 |       | 0  | 0   | 0.00E+00 | 41.54 | 3  | 4  | 2.01E+07 |
| gil341940350 splQ9LL3.2ICHSTC_MOUSE  | Chst12   | 49.4  |       | 0  | 0  | 0.00E+00 |       | 0  | 0   | 0.00E+00 | 7.40  | 2  | 2  | 1.97E+07 |
| gil118573686 splQ8VDT9.2IRM50_MOUSE  | Mrp150   | 18.2  | 49.69 | 6  | 8  | 8.85E+07 |       | 0  | 0   | 0.00E+00 | 25.79 | 3  | 4  | 1.95E+07 |
| gil338818072 splE90557.1IDESP_MOUSE  | Dsp      | 332.7 | 2.57  | 7  | 7  | 5.72E+06 | 2.53  | 7  | 7   | 4.67E+06 | 6.00  | 17 | 17 | 1.89E+07 |
| gil41688745 splQ08784.1ITCOF_MOUSE   | Tcof1    | 134.9 | 6.14  | 6  | 16 | 7.02E+07 | 3.86  | 4  | 6   | 1.74E+07 | 4.70  | 5  | 10 | 1.87E+07 |
| gil408360268 splP38647.3IGRP75_MOUSE | Hspa9    | 73.4  | 10.31 | 5  | 7  | 1.13E+07 | 21.21 | 12 | 17  | 2.16E+07 | 20.77 | 11 | 13 | 1.86E+07 |
| gil113951 splP07356.2ANXA2_MOUSE     | Anxa2    | 38.7  | 10.32 | 3  | 4  | 4.05E+07 | 21.53 | 7  | 8   | 5.99E+07 | 10.32 | 3  | 4  | 1.81E+07 |
| gil83305343 splQ02257.3IPLAK_MOUSE   | Jup      | 81.7  | 5.77  | 4  | 4  | 5.00E+06 | 11.95 | 8  | 8   | 1.17E+07 | 13.42 | 10 | 11 | 1.78E+07 |
| gil128843 splP09405.2INUCL_MOUSE     | Ncl      | 76.7  | 3.68  | 3  | 4  | 1.01E+07 | 12.16 | 8  | 11  | 3.49E+07 | 15.42 | 10 | 12 | 1.71E+07 |
| gil550544292 splP47878.2IBP3_MOUSE   | Igf1bp3  | 31.7  | 6.16  | 2  | 6  | 9.99E+06 | 8.90  | 3  | 8   | 1.73E+07 | 8.90  | 3  | 8  | 1.63E+07 |
| gil81880358 splQ9CQ06.1IRM24_MOUSE   | Mrp124   | 24.9  | 12.50 | 3  | 3  | 1.44E+07 |       | 0  | 0   | 0.00E+00 | 25.00 | 5  | 5  | 1.62E+07 |
| gil613504949 splQ9QX31.3IPLC_MOUSE   | Plec     | 533.9 |       | 0  | 0  | 0.00E+00 | 2.64  | 11 | 14  | 1.18E+07 | 0.66  | 3  | 6  | 1.62E+07 |
| gil21263432 splQ91VR2.1IATPG_MOUSE   | Atp5c1   | 32.9  |       | 0  | 0  | 0.00E+00 | 14.77 | 4  | 6   | 2.52E+07 | 11.07 | 3  | 5  | 1.61E+07 |
| gil2500582 splQ61937.1INPM_MOUSE     | Npm1     | 32.5  | 8.90  | 3  | 4  | 7.99E+06 | 14.04 | 5  | 8   | 2.06E+07 | 11.30 | 4  | 6  | 1.60E+07 |
| gil408360135 splQ00P19.2IHNR12_MOUSE | Hnmpu12  | 84.9  | 1.74  | 2  | 4  | 8.48E+06 |       | 0  | 0   | 0.00E+00 | 8.32  | 6  | 7  | 1.56E+07 |
| gil45477105 splQ81Q05.1INMES1_MOUSE  | AA467197 | 9.6   | 46.99 | 4  | 7  | 2.65E+07 | 46.99 | 4  | 5   | 2.46E+07 | 28.92 | 3  | 3  | 1.52E+07 |
| gil341940433 splQ91VN6.2IDDX41_MOUSE | Ddx41    | 69.8  |       | 0  | 0  | 0.00E+00 | 27.49 | 15 | 18  | 5.79E+07 | 9.32  | 6  | 7  | 1.49E+07 |
| gil2829839 splP97430.1ISLPI_MOUSE    | Slpi     | 14.3  | 12.98 | 2  | 2  | 9.21E+06 |       | 0  | 0   | 0.00E+00 | 12.98 | 2  | 2  | 1.48E+07 |
| gil21759257 splQ8VEM8.1IMPCC_MOUSE   | Slc25a3  | 39.6  |       | 0  | 0  | 0.00E+00 |       | 0  | 0   | 0.00E+00 | 5.32  | 2  | 3  | 1.47E+07 |
| gil81880345 splQ9CPT5.1INOP16_MOUSE  | Nop16    | 21.1  |       | 0  | 0  | 0.00E+00 | 8.43  | 2  | 3   | 1.26E+07 | 24.16 | 4  | 6  | 1.43E+07 |
| gil46397808 splQ89053.5ICOR1A_MOUSE  | Coro1a   | 51.0  | 6.94  | 3  | 5  | 1.48E+07 | 6.94  | 3  | 5   | 1.76E+07 | 10.85 | 5  | 7  | 1.41E+07 |
| gil114290 splP16460.1IASSY_MOUSE     | Ass1     | 46.6  | 9.71  | 4  | 5  | 1.39E+07 | 14.81 | 9  | 11  | 4.39E+07 | 13.11 | 6  | 7  | 1.40E+07 |
| gil215273926 splP24369.2IPPIB_MOUSE  | Ppiib    | 23.7  |       | 0  | 0  | 0.00E+00 | 9.26  | 2  | 2   | 1.51E+07 | 16.67 | 4  | 4  | 1.37E+07 |
| gil417240 splP32067.1ILA_MOUSE       | Ssb      | 47.7  | 7.71  | 3  | 3  | 3.02E+06 | 7.47  | 3  | 3   | 3.26E+06 | 9.64  | 4  | 6  | 1.34E+07 |
| gil24212379 splQ9N87.1IRT05_MOUSE    | Mmps5    | 48.2  | 4.86  | 2  | 4  | 1.25E+07 |       | 0  | 0   | 0.00E+00 | 8.56  | 4  | 6  | 1.34E+07 |
| gil85695427 splQ9D1B9.3IRM28_MOUSE   | Mrp128   | 30.2  | 8.56  | 2  | 6  | 1.71E+07 |       | 0  | 0   | 0.00E+00 | 12.06 | 3  | 5  | 1.31E+07 |

|                                       |            |       |       |    |    |          |       |    |    |          |       |   |    |          |
|---------------------------------------|------------|-------|-------|----|----|----------|-------|----|----|----------|-------|---|----|----------|
| gii20139649 spl Q99N92.1 RM27_MOUSE   | Mrpl27     | 15.9  |       | 0  | 0  | 0,00E+00 |       | 0  | 0  | 0,00E+00 | 22,97 | 3 | 4  | 1,25E+07 |
| gii71153525 spl Q08288.2 LYAR_MOUSE   | Lyar       | 43.7  |       | 0  | 0  | 0,00E+00 |       | 0  | 0  | 0,00E+00 | 18,56 | 6 | 7  | 1,25E+07 |
| gii50401030 spl Q8BG81.1 PDI3_MOUSE   | Poldip3    | 46.1  | 10,00 | 4  | 6  | 6,00E+06 | 18,57 | 8  | 15 | 2,02E+07 | 18,57 | 9 | 12 | 1,23E+07 |
| gii124028629 spl Q89569.2 ROA2_MOUSE  | Hnrpa2b1   | 37.4  | 9,07  | 3  | 5  | 1,19E+07 | 16,43 | 5  | 7  | 2,69E+07 | 11,61 | 4 | 5  | 1,21E+07 |
| gii48474242 spl Q08583.3 THOC4_MOUSE  | Alvret     | 26.9  | 8,24  | 2  | 3  | 1,18E+07 | 8,24  | 2  | 3  | 1,51E+07 | 19,22 | 4 | 4  | 1,18E+07 |
| gii218512147 spl Q9WVAA.4 TAGL2_MOUSE | Tagln2     | 22.4  | 21,11 | 4  | 5  | 1,41E+07 | 9,55  | 2  | 3  | 2,56E+07 | 15,58 | 3 | 4  | 1,17E+07 |
| gii66773932 spl Q91XV3.3 BASP1_MOUSE  | Basp1      | 22.1  | 21,68 | 3  | 3  | 8,27E+06 | 27,88 | 4  | 4  | 1,44E+07 | 27,88 | 4 | 5  | 1,15E+07 |
| gii127294 spl P24668.1 MPRD_MOUSE     | M6pr       | 31.2  | 11,51 | 3  | 3  | 1,26E+07 |       | 0  | 0  | 0,00E+00 | 11,51 | 3 | 3  | 1,14E+07 |
| gii462608 spl P26041.3 MOES_MOUSE     | Msn        | 67.7  | 14,56 | 10 | 11 | 2,17E+07 | 10,92 | 7  | 7  | 2,65E+07 | 9,71  | 7 | 7  | 1,14E+07 |
| gii20455479 spl P56480.2 ATPB_MOUSE   | Atp5b      | 56.3  | 8,88  | 3  | 3  | 7,46E+06 | 16,07 | 6  | 7  | 2,83E+08 | 11,15 | 4 | 4  | 1,13E+07 |
| gii33516945 spl Q60668.2 HNRPD_MOUSE  | Hnrmpd     | 38.3  |       | 0  | 0  | 0,00E+00 | 5,07  | 2  | 2  | 1,55E+07 | 5,07  | 2 | 2  | 1,12E+07 |
| gii32363398 spl Q9CQZ5.1 INDUA6_MOUSE | Ndufa6     | 15.3  | 25,19 | 3  | 4  | 2,11E+07 |       | 0  | 0  | 0,00E+00 | 19,08 | 2 | 2  | 1,12E+07 |
| gii156633648 spl Q8R2N0.2 TAP2_MOUSE  | Ccdc59     | 28.0  |       | 0  | 0  | 0,00E+00 | 9,17  | 2  | 2  | 1,02E+07 | 9,17  | 2 | 2  | 1,11E+07 |
| gii302425115 spl A2AJ15.1 MA1B1_MOUSE | Man1b1     | 75.1  |       | 0  | 0  | 0,00E+00 |       | 0  | 0  | 0,00E+00 | 7,14  | 5 | 5  | 1,09E+07 |
| gii134881 spl P16254.1 SRP14_MOUSE    | Srp14      | 12.5  |       | 0  | 0  | 0,00E+00 | 23,64 | 2  | 2  | 1,13E+07 | 31,82 | 3 | 3  | 1,04E+07 |
| gii18187888 spl Q8R1F0.1 L10K_MOUSE   | D8Erd738e  | 10.2  |       | 0  | 0  | 0,00E+00 |       | 0  | 0  | 0,00E+00 | 25,53 | 3 | 3  | 1,01E+07 |
| gii21362934 spl Q9D903.1 EBP2_MOUSE   | Ebna1bp2   | 34.7  |       | 0  | 0  | 0,00E+00 |       | 0  | 0  | 0,00E+00 | 9,15  | 3 | 4  | 1,01E+07 |
| gii408360150 spl Q9JKF1.2 IQGA1_MOUSE | Iqgap1     | 188.6 |       | 0  | 0  | 0,00E+00 | 38,93 | 54 | 92 | 3,20E+08 | 2,72  | 3 | 3  | 9,71E+06 |
| gii20140237 spl Q8D8Y0.1 EFHD2_MOUSE  | Efh2d      | 26.8  |       | 0  | 0  | 0,00E+00 | 67,50 | 16 | 58 | 1,51E+09 | 10,83 | 2 | 2  | 9,65E+06 |
| gii62510933 spl Q922R8.3 PDIA6_MOUSE  | Pdia6      | 48.1  |       | 0  | 0  | 0,00E+00 |       | 0  | 0  | 0,00E+00 | 6,36  | 2 | 2  | 9,31E+06 |
| gii1881612 spl Q9D8M4.1 R1L7L_MOUSE   | Rpl7l1     | 28.5  |       | 0  | 0  | 0,00E+00 |       | 0  | 0  | 0,00E+00 | 6,91  | 2 | 2  | 9,22E+06 |
| gii113607 spl P05064.2 ALDOA_MOUSE    | Aldoa      | 39.3  | 32,14 | 10 | 13 | 5,03E+07 | 23,08 | 7  | 9  | 3,11E+07 | 16,48 | 6 | 7  | 9,17E+06 |
| gii20140777 spl Q9CQ69.3 QCR8_MOUSE   | Uccrq      | 9.8   | 29,27 | 4  | 5  | 1,15E+07 | 29,27 | 4  | 10 | 3,02E+07 | 45,12 | 5 | 7  | 9,13E+06 |
| gii729023 spl P24452.2 CAPG_MOUSE     | Capg       | 39.2  | 15,63 | 5  | 7  | 2,25E+07 | 9,09  | 3  | 5  | 6,34E+07 | 9,09  | 3 | 4  | 9,02E+06 |
| gii24212196 spl Q99N85.1 IRT18A_MOUSE | Mrps18a    | 22.3  |       | 0  | 0  | 0,00E+00 |       | 0  | 0  | 0,00E+00 | 12,76 | 3 | 3  | 8,72E+06 |
| gii462064 spl Q05816.3 FABP5_MOUSE    | Fabp5      | 15.1  | 13,33 | 2  | 2  | 1,56E+07 | 13,33 | 2  | 2  | 1,82E+07 | 13,33 | 2 | 2  | 8,54E+06 |
| gii3913473 spl O70503.1 DHB12_MOUSE   | Hsd17b12   | 34.7  | 4,81  | 2  | 3  | 3,73E+06 | 9,94  | 3  | 6  | 1,22E+07 | 9,94  | 3 | 6  | 8,33E+06 |
| gii30913111 spl Q99M87.1 DNJA3_MOUSE  | Dnaja3     | 52.4  |       | 0  | 0  | 0,00E+00 |       | 0  | 0  | 0,00E+00 | 5,00  | 2 | 2  | 8,30E+06 |
| gii1350822 spl P49312.2 ROA1_MOUSE    | Hnrpa1     | 34.2  |       | 0  | 0  | 0,00E+00 | 16,88 | 4  | 6  | 1,11E+07 | 12,81 | 3 | 4  | 8,30E+06 |
| gii113945 spl P10107.2 IANXA1_MOUSE   | Anxa1      | 38.7  | 5,49  | 2  | 2  | 1,41E+07 | 5,49  | 2  | 3  | 2,23E+07 | 5,49  | 2 | 2  | 7,89E+06 |
| gii24636295 spl Q9D8B3.2 CHM4B_MOUSE  | Chmp4b     | 24.9  | 10,71 | 2  | 3  | 7,49E+06 | 10,71 | 2  | 3  | 6,10E+06 | 10,71 | 2 | 3  | 7,86E+06 |
| gii60416372 spl Q61495.2 DSG1A_MOUSE  | Dsg1a      | 114.5 | 1,99  | 2  | 2  | 9,72E+06 |       | 0  | 0  | 0,00E+00 | 1,51  | 2 | 2  | 7,79E+06 |
| gii1917732 spl Q9QYL7.1 ABT1_MOUSE    | Abt1       | 30.6  |       | 0  | 0  | 0,00E+00 |       | 0  | 0  | 0,00E+00 | 7,43  | 2 | 2  | 7,50E+06 |
| gii353678156 spl D3YXK2.2 SAFB1_MOUSE | Safb       | 105.0 | 2,35  | 3  | 3  | 4,50E+06 | 2,35  | 3  | 4  | 1,34E+07 | 3,09  | 3 | 4  | 7,11E+06 |
| gii60943276 spl P70279.1 SURF6_MOUSE  | Surf6      | 41.2  |       | 0  | 0  | 0,00E+00 |       | 0  | 0  | 0,00E+00 | 10,14 | 4 | 4  | 6,71E+06 |
| gii122239 spl P14483.1 HB2A_MOUSE     | H2-Ab1     | 30.1  |       | 0  | 0  | 0,00E+00 | 18,49 | 4  | 4  | 1,80E+07 | 9,43  | 2 | 2  | 6,67E+06 |
| gii90185245 spl Q69ZN2.1 GNPTA_MOUSE  | Gnptab     | 140.9 |       | 0  | 0  | 0,00E+00 |       | 0  | 0  | 0,00E+00 | 1,38  | 2 | 3  | 6,64E+06 |
| gii110825747 spl P52875.2 TM165_MOUSE | Tmem165    | 34.8  |       | 0  | 0  | 0,00E+00 |       | 0  | 0  | 0,00E+00 | 8,36  | 2 | 2  | 6,54E+06 |
| gii50401658 spl Q99N89.1 RM43_MOUSE   | Mrpl43     | 20.2  | 14,21 | 3  | 4  | 6,70E+06 |       | 0  | 0  | 0,00E+00 | 10,38 | 2 | 3  | 6,52E+06 |
| gii341942168 spl Q64012.3 RALY_MOUSE  | Raly       | 33.2  |       | 0  | 0  | 0,00E+00 |       | 0  | 0  | 0,00E+00 | 6,73  | 2 | 2  | 6,38E+06 |
| gii416621 spl P32261.1 ANT3_MOUSE     | Serpinc1   | 52.0  | 9,46  | 5  | 5  | 2,94E+07 | 4,30  | 2  | 2  | 1,51E+07 | 3,44  | 2 | 2  | 6,16E+06 |
| gii2494835 spl Q64692.1 SIA8D_MOUSE   | St8sia4    | 41.2  |       | 0  | 0  | 0,00E+00 |       | 0  | 0  | 0,00E+00 | 11,98 | 4 | 5  | 6,10E+06 |
| gii1345668 spl P47757.3 CAPZB_MOUSE   | Capzb      | 31.3  |       | 0  | 0  | 0,00E+00 | 43,32 | 14 | 43 | 4,28E+08 | 10,47 | 3 | 3  | 6,08E+06 |
| gii71151920 spl Q91VE6.1 MK671_MOUSE  | Nrkf       | 36.2  |       | 0  | 0  | 0,00E+00 |       | 0  | 0  | 0,00E+00 | 8,20  | 2 | 2  | 6,04E+06 |
| gii52782750 spl Q9CPO8.1 ATP5L_MOUSE  | Atp5l      | 11.4  |       | 0  | 0  | 0,00E+00 |       | 0  | 0  | 0,00E+00 | 25,24 | 2 | 2  | 5,90E+06 |
| gii12230747 spl Q88342.3 WDR1_MOUSE   | Wdr1       | 66.4  |       | 0  | 0  | 0,00E+00 |       | 0  | 0  | 0,00E+00 | 6,93  | 4 | 4  | 5,89E+06 |
| gii54041950 spl Q99N94.2 RM09_MOUSE   | Mrpl9      | 30.2  | 10,94 | 3  | 3  | 5,54E+06 |       | 0  | 0  | 0,00E+00 | 7,92  | 2 | 2  | 5,77E+06 |
| gii3913652 spl Q09046.1 IOXLA_MOUSE   | Ii4i1      | 70.1  |       | 0  | 0  | 0,00E+00 |       | 0  | 0  | 0,00E+00 | 3,81  | 2 | 2  | 5,59E+06 |
| gii3419411149 spl Q8B8T8.5 FLNA_MOUSE | Flna       | 281.0 | 1,40  | 3  | 3  | 2,60E+06 | 6,16  | 13 | 13 | 1,46E+07 | 2,46  | 5 | 5  | 5,10E+06 |
| gii73620958 spl Q62095.2 DDX3Y_MOUSE  | Ddx3y      | 73.4  |       | 0  | 0  | 0,00E+00 | 6,08  | 4  | 5  | 1,66E+07 | 4,86  | 3 | 3  | 5,02E+06 |
| gii13633865 spl Q9QU10.1 RHOA_MOUSE   | Rhoa       | 21.8  |       | 0  | 0  | 0,00E+00 | 8,29  | 2  | 2  | 5,27E+06 | 22,28 | 5 | 8  | 4,88E+06 |
| gii158705865 spl A2AJ10.1 MA7D1_MOUSE | Map7d1     | 93.2  | 9,34  | 7  | 9  | 8,78E+06 | 6,38  | 5  | 8  | 9,65E+06 | 2,36  | 2 | 3  | 4,84E+06 |
| gii1880318 spl Q99N93.1 RM16_MOUSE    | Mrpl16     | 28.8  |       | 0  | 0  | 0,00E+00 |       | 0  | 0  | 0,00E+00 | 10,76 | 2 | 2  | 4,84E+06 |
| gii3799719 spl Q8R0X7.1 ISGPL1_MOUSE  | Sgpl1      | 63.6  |       | 0  | 0  | 0,00E+00 |       | 0  | 0  | 0,00E+00 | 5,81  | 3 | 3  | 4,82E+06 |
| gii122134 spl P14430.1 HA18_MOUSE     | H2-Q8      | 37.4  | 8,90  | 3  | 3  | 8,62E+06 |       | 0  | 0  | 0,00E+00 | 5,83  | 2 | 2  | 4,79E+06 |
| gii18202285 spl P58252.2 EF2_MOUSE    | Eef2       | 95.3  | 4,66  | 4  | 4  | 5,38E+06 | 2,10  | 2  | 2  | 1,05E+07 | 2,91  | 3 | 3  | 4,51E+06 |
| gii548926 spl P30882.2 CCCL5_MOUSE    | Ccl5       | 10.1  |       | 0  | 0  | 0,00E+00 |       | 0  | 0  | 0,00E+00 | 20,88 | 2 | 2  | 4,50E+06 |
| gii119364598 spl P54987.2 IRG1_MOUSE  | Irg1       | 53.7  | 3,28  | 2  | 2  | 2,64E+06 |       | 0  | 0  | 0,00E+00 | 7,38  | 4 | 4  | 4,48E+06 |
| gii226693542 spl Q9WIT7.2 MYO1C_MOUSE | Myo1c      | 121.9 |       | 0  | 0  | 0,00E+00 | 20,13 | 17 | 21 | 6,89E+07 | 2,54  | 2 | 2  | 4,06E+06 |
| gii3024089 spl Q61792.1 LASP1_MOUSE   | Lasp1      | 30.0  | 5,32  | 2  | 2  | 1,72E+06 |       | 0  | 0  | 0,00E+00 | 10,27 | 3 | 3  | 3,65E+06 |
| gii20455216 spl Q9Z204.1 HNRPC_MOUSE  | Hnrmpc     | 34.4  |       | 0  | 0  | 0,00E+00 | 18,53 | 7  | 8  | 2,41E+07 | 7,03  | 2 | 2  | 3,61E+06 |
| gii62510510 spl Q9CRB9.1 CHCH3_MOUSE  | Chchd3     | 26.3  | 15,42 | 3  | 4  | 3,11E+06 | 8,81  | 2  | 3  | 4,13E+06 | 8,81  | 2 | 3  | 3,61E+06 |
| gii46395721 spl Q7TPR4.1 ACTN1_MOUSE  | Actn1      | 103.0 |       | 0  | 0  | 0,00E+00 | 40,13 | 32 | 52 | 1,22E+08 | 1,91  | 2 | 2  | 3,59E+06 |
| gii62510642 spl Q8C111.2 GNL3_MOUSE   | Gnl3       | 60.7  |       | 0  | 0  | 0,00E+00 | 4,65  | 2  | 3  | 3,46E+06 | 7,62  | 4 | 4  | 3,58E+06 |
| gii85701216 spl Q9CW46.2 RAVR1_MOUSE  | Raver1     | 79.3  |       | 0  | 0  | 0,00E+00 |       | 0  | 0  | 0,00E+00 | 2,67  | 2 | 2  | 3,50E+06 |
| gii52783420 spl Q9CQ17.1 RU2B_MOUSE   | Snrbp2     | 25.3  |       | 0  | 0  | 0,00E+00 |       | 0  | 0  | 0,00E+00 | 11,56 | 2 | 2  | 3,36E+06 |
| gii18804111 spl Q9CR59.1 G45IP_MOUSE  | Gadd45qjp1 | 25.8  | 8,56  | 2  | 3  | 1,57E+07 |       | 0  | 0  | 0,00E+00 | 8,56  | 2 | 2  | 3,30E+06 |
| gii25089776 spl Q8DQC2.3 ATP5H_MOUSE  | Atp5h      | 18.7  |       | 0  | 0  | 0,00E+00 |       | 0  | 0  | 0,00E+00 | 13,04 | 2 | 2  | 3,24E+06 |

|                                      |          |       |       |    |    |          |       |    |    |          |       |   |   |          |
|--------------------------------------|----------|-------|-------|----|----|----------|-------|----|----|----------|-------|---|---|----------|
| gii711538261spiQ7TPV4.2IMBB1A_MOUSE  | Mybbp1a  | 151.9 |       | 0  | 0  | 0.00E+00 |       | 0  | 0  | 0.00E+00 | 1.93  | 2 | 2 | 3.14E+06 |
| gii341942181spiP14685.3IPSM3_MOUSE   | Psm3d    | 60.7  |       | 0  | 0  | 0.00E+00 |       | 0  | 0  | 0.00E+00 | 6.79  | 3 | 3 | 2.79E+06 |
| gii83305133spiP52503.2INDUS6_MOUSE   | Ndufs6   | 13.0  |       | 0  | 0  | 0.00E+00 | 22.41 | 2  | 2  | 5.70E+06 | 22.41 | 2 | 2 | 2.52E+06 |
| gii1351218spiP47226.1ITES_MOUSE      | Tes      | 48.0  |       | 0  | 0  | 0.00E+00 |       | 0  | 0  | 0.00E+00 | 5.44  | 2 | 2 | 2.33E+06 |
| gii52783213spiQ9CY58.2IPAIRB_MOUSE   | Serbp1   | 44.7  |       | 0  | 0  | 0.00E+00 |       | 0  | 0  | 0.00E+00 | 6.63  | 2 | 2 | 2.29E+06 |
| gii3419409261spiP27046.2IMAZA1_MOUSE | Man2a1   | 131.5 |       | 0  | 0  | 0.00E+00 |       | 0  | 0  | 0.00E+00 | 1.48  | 2 | 2 | 1.96E+06 |
| gii1358351spiP26350.2IPTMA_MOUSE     | Ptma     | 12.2  | 13.51 | 3  | 3  | 4.12E+06 | 13.51 | 3  | 4  | 9.37E+06 | 13.51 | 3 | 3 | 1.76E+06 |
| gii612119301spiQ9EP78.1ICHST7_MOUSE  | Chst7    | 54.7  |       | 0  | 0  | 0.00E+00 |       | 0  | 0  | 0.00E+00 | 2.48  | 2 | 2 | 1.71E+06 |
| gii81896062spiQ8BGZ7.1IK2C75_MOUSE   | Krt75    | 59.7  | 15.97 | 12 | 26 | 8.80E+08 |       | 0  | 0  | 0.00E+00 |       | 0 | 0 | 0.00E+00 |
| gii123797712spiQ8VED5.2IK2C79_MOUSE  | Krt79    | 57.5  | 9.42  | 9  | 30 | 7.32E+08 |       | 0  | 0  | 0.00E+00 |       | 0 | 0 | 0.00E+00 |
| gii5490781spiP10639.3ITHIO_MOUSE     | Txn1     | 11.7  | 20.95 | 2  | 3  | 4.47E+07 |       | 0  | 0  | 0.00E+00 |       | 0 | 0 | 0.00E+00 |
| gii484281481spiQ9CQP1.3ICOX6C_MOUSE  | Cox6c    | 8.5   | 11.84 | 2  | 3  | 3.38E+07 | 21.05 | 3  | 4  | 5.09E+07 |       | 0 | 0 | 0.00E+00 |
| gii146345481spiP09411.4IPGK1_MOUSE   | Pgk1     | 44.5  | 16.79 | 5  | 6  | 3.04E+07 | 16.79 | 5  | 5  | 3.56E+07 |       | 0 | 0 | 0.00E+00 |
| gii3419412441spiP49290.2IPERE_MOUSE  | Epx      | 81.3  | 9.36  | 7  | 10 | 2.60E+07 | 3.07  | 2  | 2  | 6.51E+06 |       | 0 | 0 | 0.00E+00 |
| gii201417891spiP99029.2IPRD5_MOUSE   | Prdx5    | 21.9  | 23.81 | 4  | 4  | 1.85E+07 | 15.71 | 3  | 4  | 1.51E+07 |       | 0 | 0 | 0.00E+00 |
| gii1193621spiP08113.2ENPL_MOUSE      | Hsp90b1  | 92.4  | 5.24  | 4  | 4  | 1.66E+07 | 7.48  | 6  | 7  | 2.20E+07 |       | 0 | 0 | 0.00E+00 |
| gii32363971spiQ9CCQ7.3INDUB4_MOUSE   | Ndufb4   | 15.1  | 35.66 | 3  | 3  | 1.65E+07 |       | 0  | 0  | 0.00E+00 |       | 0 | 0 | 0.00E+00 |
| gii213629041spiQ9CYH6.1IRRS1_MOUSE   | Rrs1     | 41.5  | 5.48  | 2  | 2  | 1.38E+07 |       | 0  | 0  | 0.00E+00 |       | 0 | 0 | 0.00E+00 |
| gii7309561spiP40142.1ITKT_MOUSE      | Tkt      | 67.6  | 9.47  | 6  | 6  | 1.31E+07 | 6.58  | 4  | 6  | 1.85E+07 |       | 0 | 0 | 0.00E+00 |
| gii21759071spiQ9CQI6.3ICOTL1_MOUSE   | Cott1    | 15.9  | 11.27 | 2  | 3  | 1.18E+07 | 11.27 | 2  | 3  | 2.25E+07 |       | 0 | 0 | 0.00E+00 |
| gii3419406301spiQ9VW32.4IARC1B_MOUSE | Arpc1b   | 41.0  | 8.33  | 2  | 3  | 1.17E+07 | 42.74 | 16 | 33 | 4.96E+08 |       | 0 | 0 | 0.00E+00 |
| gii1175021spiP14211.1ICALR_MOUSE     | Calr     | 48.0  | 5.29  | 3  | 3  | 1.12E+07 | 6.49  | 3  | 3  | 2.07E+07 |       | 0 | 0 | 0.00E+00 |
| gii321304231spiP51174.2IACADL_MOUSE  | Acadl    | 47.9  | 5.58  | 2  | 2  | 1.05E+07 | 13.49 | 5  | 5  | 3.71E+07 |       | 0 | 0 | 0.00E+00 |
| gii3419411971spiQ35375.2INRP2_MOUSE  | Nrp2     | 104.6 | 2.79  | 2  | 4  | 9.26E+06 |       | 0  | 0  | 0.00E+00 |       | 0 | 0 | 0.00E+00 |
| gii410177931spiQ9CQL5.1IRM18_MOUSE   | Mrp18    | 20.7  | 11.67 | 2  | 3  | 7.88E+06 |       | 0  | 0  | 0.00E+00 |       | 0 | 0 | 0.00E+00 |
| gii25005661spiP97425.1IECP2_MOUSE    | Ear2     | 17.6  | 12.18 | 2  | 2  | 7.31E+06 |       | 0  | 0  | 0.00E+00 |       | 0 | 0 | 0.00E+00 |
| gii3535263541spiP17751.4ITPIS_MOUSE  | Tpi1     | 32.2  | 13.38 | 3  | 5  | 7.13E+06 | 16.72 | 4  | 6  | 1.47E+07 |       | 0 | 0 | 0.00E+00 |
| gii1149301spiP28667.2IMRP_MOUSE      | Marcks1  | 20.2  | 14.00 | 2  | 2  | 7.11E+06 | 14.00 | 2  | 2  | 1.67E+07 |       | 0 | 0 | 0.00E+00 |
| gii13519421spiP48036.1IANXA5_MOUSE   | Anxa5    | 35.7  | 12.54 | 5  | 5  | 6.99E+06 | 11.29 | 4  | 4  | 1.39E+07 |       | 0 | 0 | 0.00E+00 |
| gii3419412391spiP09103.2IPDIA1_MOUSE | P4hb     | 57.0  | 6.29  | 3  | 4  | 6.65E+06 | 4.72  | 2  | 2  | 1.09E+07 |       | 0 | 0 | 0.00E+00 |
| gii46396651spiQ9EQU5.1ISET_MOUSE     | Set      | 33.4  | 8.30  | 2  | 2  | 5.96E+06 |       | 0  | 0  | 0.00E+00 |       | 0 | 0 | 0.00E+00 |
| gii3419408301spiQ64282.2IFIT1_MOUSE  | Ifit1    | 53.7  | 6.05  | 2  | 2  | 5.03E+06 |       | 0  | 0  | 0.00E+00 |       | 0 | 0 | 0.00E+00 |
| gii885660571spiQ8VJL6.1ISFPQ_MOUSE   | Sfpq     | 75.4  | 4.15  | 2  | 2  | 5.01E+06 |       | 0  | 0  | 0.00E+00 |       | 0 | 0 | 0.00E+00 |
| gii819035021spiQ9CPY1.1IRM51_MOUSE   | Mrp51    | 15.1  | 17.97 | 3  | 3  | 4.08E+06 |       | 0  | 0  | 0.00E+00 |       | 0 | 0 | 0.00E+00 |
| gii17082591spiP30681.3IHMG82_MOUSE   | Hmg82    | 24.1  | 13.81 | 2  | 2  | 3.96E+06 |       | 0  | 0  | 0.00E+00 |       | 0 | 0 | 0.00E+00 |
| gii28515961spiQ93092.2ITALDO_MOUSE   | Takdo1   | 37.4  | 5.04  | 2  | 2  | 3.91E+06 | 5.04  | 2  | 2  | 3.15E+06 |       | 0 | 0 | 0.00E+00 |
| gii24947031spiQ61599.3IGDIR2_MOUSE   | Arhgdib  | 22.8  | 10.50 | 2  | 2  | 3.80E+06 |       | 0  | 0  | 0.00E+00 |       | 0 | 0 | 0.00E+00 |
| gii173686191spiQ9ME9.3INOG1_MOUSE    | Gtpbp4   | 74.1  | 2.84  | 2  | 2  | 2.47E+06 |       | 0  | 0  | 0.00E+00 |       | 0 | 0 | 0.00E+00 |
| gii711519831spiQ6URW6.1IMYH14_MOUSE  | Mvh14    | 228.4 |       | 0  | 0  | 0.00E+00 | 4.95  | 12 | 53 | 7.23E+09 |       | 0 | 0 | 0.00E+00 |
| gii471165731spiQ9JY9.3IARP3_MOUSE    | Actr3    | 47.3  |       | 0  | 0  | 0.00E+00 | 45.69 | 17 | 43 | 5.70E+08 |       | 0 | 0 | 0.00E+00 |
| gii1108257061spiQ9CVB6.3IARPC2_MOUSE | Arpc2    | 34.3  |       | 0  | 0  | 0.00E+00 | 64.00 | 20 | 57 | 5.70E+08 |       | 0 | 0 | 0.00E+00 |
| gii342237301spiP47753.4ICAZA1_MOUSE  | Capza1   | 32.9  |       | 0  | 0  | 0.00E+00 | 65.03 | 14 | 24 | 5.01E+08 |       | 0 | 0 | 0.00E+00 |
| gii597995241spiQ9J28.1IFLI1_MOUSE    | Flii     | 144.7 |       | 0  | 0  | 0.00E+00 | 2.52  | 3  | 4  | 4.26E+08 |       | 0 | 0 | 0.00E+00 |
| gii625104601spiQ9CPW4.3IARPC5_MOUSE  | Arpc5    | 16.3  |       | 0  | 0  | 0.00E+00 | 53.64 | 8  | 15 | 3.91E+08 |       | 0 | 0 | 0.00E+00 |
| gii628998931spiQ9JM76.3IARPC3_MOUSE  | Arpc3    | 20.5  |       | 0  | 0  | 0.00E+00 | 30.90 | 6  | 23 | 2.84E+08 |       | 0 | 0 | 0.00E+00 |
| gii38372251spiQ99MU3.2IDSRAD_MOUSE   | Adar     | 130.4 |       | 0  | 0  | 0.00E+00 | 2.89  | 3  | 3  | 2.42E+08 |       | 0 | 0 | 0.00E+00 |
| gii3419409831spiQ99104.2IMYO5A_MOUSE | Myo5a    | 215.4 |       | 0  | 0  | 0.00E+00 | 28.01 | 52 | 82 | 1.48E+08 |       | 0 | 0 | 0.00E+00 |
| gii219033821spiP48962.4IADT1_MOUSE   | Slc25a4  | 32.9  |       | 0  | 0  | 0.00E+00 | 16.78 | 5  | 12 | 1.35E+08 |       | 0 | 0 | 0.00E+00 |
| gii131239461spiP57780.1IACNA1_MOUSE  | Actn4    | 104.9 |       | 0  | 0  | 0.00E+00 | 34.54 | 27 | 37 | 1.06E+08 |       | 0 | 0 | 0.00E+00 |
| gii818795961spiQ91WK0.1ILRRF2_MOUSE  | Lrrfp2   | 47.1  |       | 0  | 0  | 0.00E+00 | 22.17 | 9  | 13 | 6.11E+07 |       | 0 | 0 | 0.00E+00 |
| gii628996731spiQ70200.1IAIF1_MOUSE   | Aif1     | 16.9  |       | 0  | 0  | 0.00E+00 | 26.53 | 4  | 5  | 5.93E+07 |       | 0 | 0 | 0.00E+00 |
| gii246382181spiQ91YW3.1ISH3L3_MOUSE  | Sh3bgrl3 | 10.5  |       | 0  | 0  | 0.00E+00 | 26.88 | 2  | 3  | 5.32E+07 |       | 0 | 0 | 0.00E+00 |
| gii242115581spiQ9QYB1.3ICLIC4_MOUSE  | Clic4    | 28.7  |       | 0  | 0  | 0.00E+00 | 5.53  | 2  | 3  | 3.55E+07 |       | 0 | 0 | 0.00E+00 |
| gii39135811spiQ61878.1IPRG2_MOUSE    | Prg2     | 24.2  |       | 0  | 0  | 0.00E+00 | 13.45 | 3  | 5  | 3.17E+07 |       | 0 | 0 | 0.00E+00 |
| gii3419406101spiQ60604.3IADSV_MOUSE  | Scn      | 80.2  |       | 0  | 0  | 0.00E+00 | 14.13 | 9  | 10 | 3.09E+07 |       | 0 | 0 | 0.00E+00 |
| gii1463454801spiP27773.2IPDIA3_MOUSE | Pdia3    | 56.6  |       | 0  | 0  | 0.00E+00 | 19.01 | 7  | 7  | 2.86E+07 |       | 0 | 0 | 0.00E+00 |
| gii818824071spiQ569Z6.1ITR150_MOUSE  | Thrap3   | 108.1 |       | 0  | 0  | 0.00E+00 | 5.89  | 5  | 8  | 2.23E+07 |       | 0 | 0 | 0.00E+00 |
| gii173803331spiQ9D855.3IQCR7_MOUSE   | Uacr7    | 13.5  |       | 0  | 0  | 0.00E+00 | 21.62 | 2  | 5  | 1.75E+07 |       | 0 | 0 | 0.00E+00 |
| gii136293691spiQ9WU43.1IK6PP_MOUSE   | Pfkp     | 85.4  |       | 0  | 0  | 0.00E+00 | 5.23  | 4  | 4  | 1.69E+07 |       | 0 | 0 | 0.00E+00 |
| gii146345421spiQ61553.4IFSCN1_MOUSE  | Fscn1    | 54.5  |       | 0  | 0  | 0.00E+00 | 4.26  | 2  | 3  | 1.63E+07 |       | 0 | 0 | 0.00E+00 |
| gii24940221spiQ62426.1ICYTB_MOUSE    | Cstb     | 11.0  |       | 0  | 0  | 0.00E+00 | 32.65 | 2  | 2  | 1.58E+07 |       | 0 | 0 | 0.00E+00 |
| gii818815921spiQ9D898.1IARPSL_MOUSE  | Arpc5l   | 17.0  |       | 0  | 0  | 0.00E+00 | 46.41 | 4  | 4  | 1.42E+07 |       | 0 | 0 | 0.00E+00 |
| gii1164871spiP08207.2IS10A_MOUSE     | S100a10  | 11.2  |       | 0  | 0  | 0.00E+00 | 27.84 | 2  | 5  | 1.37E+07 |       | 0 | 0 | 0.00E+00 |
| gii1267521spiP26645.2IMARCS_MOUSE    | Marcks   | 29.6  |       | 0  | 0  | 0.00E+00 | 11.65 | 2  | 3  | 1.23E+07 |       | 0 | 0 | 0.00E+00 |
| gii465771161spiQ9D1G1.1IRAB1B_MOUSE  | Rab1b    | 22.2  |       | 0  | 0  | 0.00E+00 | 19.40 | 4  | 4  | 1.15E+07 |       | 0 | 0 | 0.00E+00 |
| gii819024781spiQ91Z49.1IUIF_MOUSE    | Fytd1    | 35.9  |       | 0  | 0  | 0.00E+00 | 6.94  | 2  | 2  | 9.93E+06 |       | 0 | 0 | 0.00E+00 |
| gii341940791spiP49710.2IHCLS1_MOUSE  | Hcls1    | 54.2  |       | 0  | 0  | 0.00E+00 | 4.53  | 2  | 2  | 6.35E+06 |       | 0 | 0 | 0.00E+00 |
| gii122305891spiQ9JU8.1ISH3L1_MOUSE   | Sh3bgrl  | 12.8  |       | 0  | 0  | 0.00E+00 | 20.18 | 2  | 2  | 6.12E+06 |       | 0 | 0 | 0.00E+00 |
| gii559762011spiQ9D0E1.3IHNRPM_MOUSE  | Hnrpm    | 77.6  |       | 0  | 0  | 0.00E+00 | 3.29  | 2  | 2  | 4.91E+06 |       | 0 | 0 | 0.00E+00 |
| gii347595711spiQ52K18.2ISRRM1_MOUSE  | Srrm1    | 106.8 |       | 0  | 0  | 0.00E+00 | 2.22  | 2  | 2  | 4.34E+06 |       | 0 | 0 | 0.00E+00 |
| gii540410711spiQ9WUM4.2ICOR1C_MOUSE  | Coro1c   | 53.1  |       | 0  | 0  | 0.00E+00 | 7.81  | 3  | 3  | 3.84E+06 |       | 0 | 0 | 0.00E+00 |
| gii212633741spiQ91V92.1IACLY_MOUSE   | Acly     | 119.7 |       | 0  | 0  | 0.00E+00 | 1.56  | 2  | 2  | 2.66E+06 |       | 0 | 0 | 0.00E+00 |
| gii1108164181spiQ9D877.2ISLIRP_MOUSE | Sllrp    | 12.6  |       | 0  | 0  | 0.00E+00 | 16.96 | 2  | 2  | 1.67E+06 |       | 0 | 0 | 0.00E+00 |
